# Supplementary material for: Physiological characterization of the hematophagy ofOrnithodoros rostratus(Acari: Argasidae) on live hosts
Source: Oxford University Press journal article supplement (doi:10.1242/jeb.144246), 2016-01-01
Supplement: jeb144246supp.pdf [file jeb144246supp.pdf]

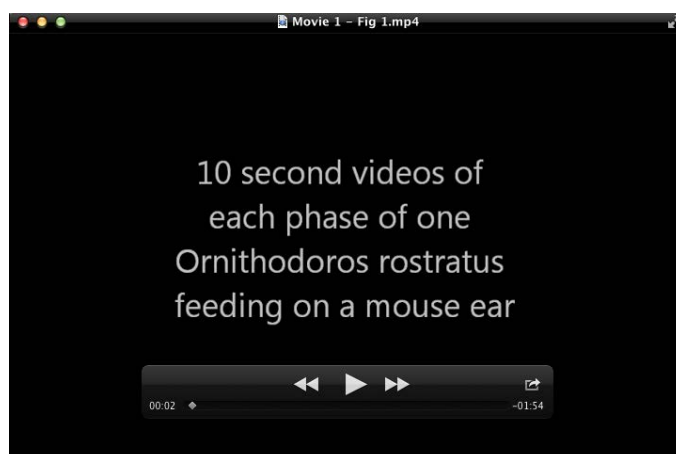

Movie 1. Images of bite site and feeding pool of one specimen at different moments during *Ornithodoros rostratus* blood feed. Movie shows 10 second videos of different moments of phase 1 and 2.

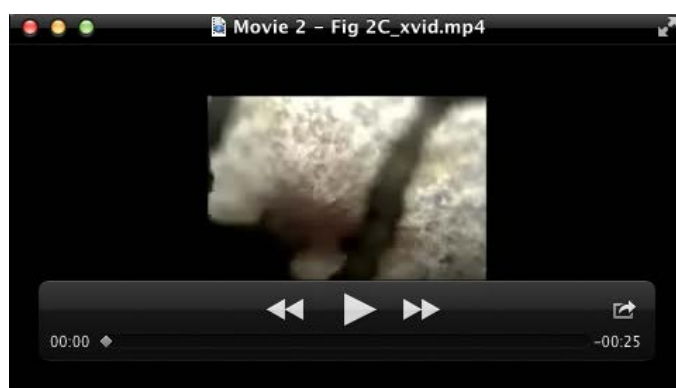

Movie 2. Variation in size of the feeding pool during phase 2b of *Ornithodoros rostratus* engorgement on mice. Video shows images represented in figure 2C.

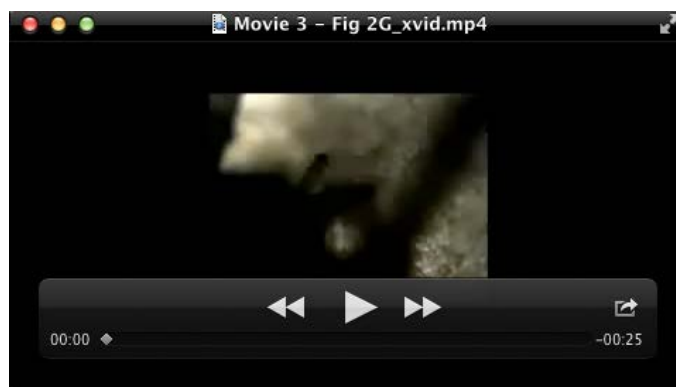

Movie 3. Variation in size of the feeding pool during phase 2a of *Ornithodoros rostratus* engorgement on mice. Video shows images represented in figure 2G.

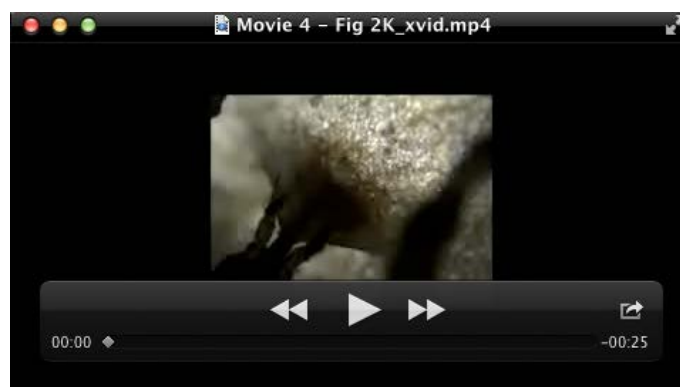

Movie 4. Variation in size of the feeding pool during phase 2d of *Ornithodoros rostratus* engorgement on mice. Video shows images represented in figure 2K.

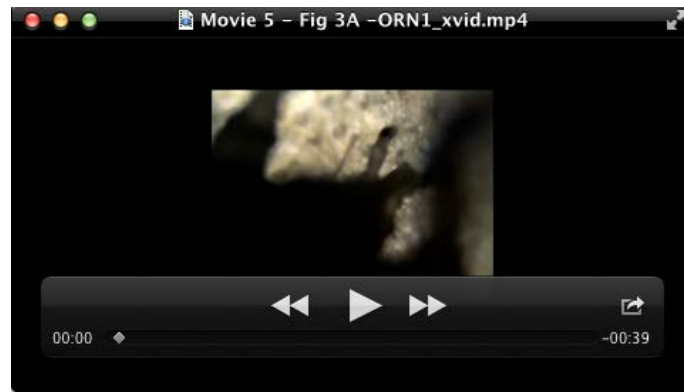

Movie 5. Images of the bite site during phase 1a of *Ornithodoros rostratus* feeding on mice. Video shows images represented in figure 3A.

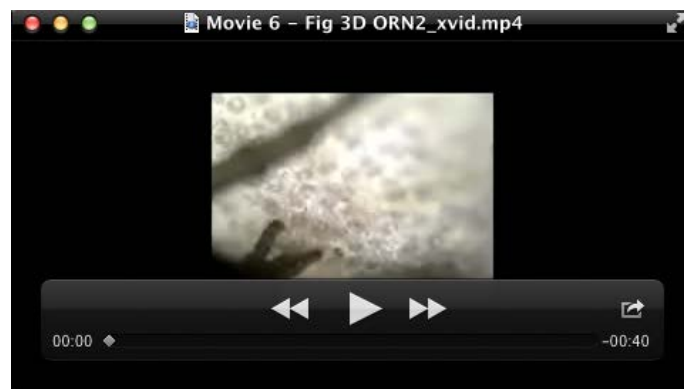

Movie 6. Images of the bite site during phase 1b of *Ornithodoros rostratus* feeding on mice. Video shows images represented in figure 3D.
